# Supplementary material
Source: publisher figshare collection journal article supplement (https://rs.figshare.com/ndownloader/files/14241044)
Supplement: Supplementary file 1 [file 14241044]

run	player	answer	choice	time	group	followed
1	4	10	10	-5.733777014	0	0
1	0	10	10	-5.366203417	0	0
1	3	10	11	-5.01004456	0	0
1	1	10	10	-3.828735262	0	0
1	2	10	10	0	0	0
2	4	11	12	-9.288813765	0	0
2	1	11	11	-7.923806079	0	0
2	3	11	11	-6.292549451	0	0
2	0	11	12	-5.906274201	0	0
2	2	11	12	0	0	0
3	3	12	12	-5.280040915	0	1
3	1	12	11	-4.863773541	0	0
3	4	12	13	-3.731267811	0	0
3	0	12	12	-1.11374142	0	1
3	2	12	13	0	0	0
3	1	12	12	7.078858838	0	0
4	2	9	9	-2.077507273	0	0
4	0	9	10	-1.908755625	0	0
4	4	9	8	-1.736256771	0	0
4	1	9	9	-0.866229288	0	0
4	3	9	10	0	0	0
5	4	11	13	-10.1437919	0	1
5	3	11	12	-9.397533509	0	1
5	0	11	13	-9.258649194	0	1
5	1	11	10	-6.371271498	0	0
5	2	11	13	0	0	1
5	1	11	12	5.504727631	0	0
5	1	11	13	6.786594507	0	0
5	0	11	14	10.19905151	0	0
6	4	12	11	-3.888770239	0	0
6	3	12	11	-3.435045547	0	0
6	0	12	13	-2.553749104	0	1
6	1	12	12	-0.296247577	0	0
6	2	12	14	0	0	0
6	1	12	13	4.243830251	0	0
6	0	12	12	9.051607112	0	0
7	1	9	10	-0.712511566	0	0
7	3	9	7	-0.386263792	0	1
7	2	9	9	-0.168747169	0	1
7	4	9	9	-0.097471617	0	1
7	0	9	9	0	0	0
7	0	9	7	0.940004661	0	0
7	0	9	9	4.427702544	0	0
8	1	10	10	-4.391233603	0	1
8	3	10	11	-4.311852864	0	0
8	4	10	11	-3.978773902	0	0
8	0	10	9	-1.091261207	0	0
8	2	10	10	0	0	1
8	0	10	10	3.9214151	0	0
9	1	8	8	-2.332522254	0	1
9	2	8	8	-2.283731081	0	1
9	3	8	6	-1.736314947	0	0
9	4	8	8	-1.447554386	0	1
9	0	8	7	0	0	0
9	0	8	8	5.507863695	0	0
1	0	10	12	-2.591242202	1	1
1	3	10	12	-1.882500185	1	1
1	2	10	10	-1.631251472	1	0
1	4	10	10	-0.716252366	1	0
1	1	10	11	0	1	0
1	1	10	12	8.567580403	1	0
2	3	11	12	-9.27394166	1	0
2	1	11	10	-7.818291306	1	0
2	0	11	12	-7.305164965	1	0
2	4	11	11	-4.867657412	1	0
2	2	11	11	0	1	0
3	1	12	13	-3.003756121	1	1
3	0	12	13	-2.175003265	1	1
3	3	12	12	-2.028756725	1	0
3	4	12	13	-1.087446763	1	1
3	2	12	13	0	1	1
3	3	12	13	5.931458035	1	0
4	3	9	9	-5.943758549	1	0
4	4	9	9	-5.902481735	1	0
4	1	9	9	-4.668555831	1	0
4	0	9	9	-2.827487614	1	0
4	2	9	10	0	1	0
5	1	11	11	-4.623742331	1	0
5	3	11	12	-4.548759156	1	0
5	0	11	12	-4.40249522	1	0
5	4	11	11	-0.997489245	1	0
5	2	11	12	0	1	0
6	1	12	12	-4.998726486	1	0
6	2	12	10	-4.155024598	1	0
6	3	12	11	-3.303768976	1	1
6	0	12	14	-2.864985504	1	0
6	4	12	11	0	1	1
6	0	12	11	8.132709551	1	0
7	1	9	9	-2.321277408	1	0
7	2	9	9	-1.454945413	1	0
7	3	9	7	-1.391217917	1	0
7	0	9	7	-1.245021221	1	0
7	4	9	10	0	1	0
8	1	10	10	-6.723751951	1	0
8	3	10	11	-6.378791743	1	0
8	2	10	10	-4.260026875	1	0
8	4	10	9	-1.455025048	1	0
8	0	10	9	0	1	0
9	2	8	8	-2.782577917	1	0
9	1	8	8	-2.54631089	1	0
9	0	8	8	-2.055046279	1	0
9	3	8	8	-1.39130526	1	0
9	4	8	8	0	1	0
1	0	10	11	-2.598793227	2	0
1	1	10	10	-1.826268612	2	0
1	2	10	12	-1.545023607	2	0
1	4	10	11	-1.458751264	2	0
1	3	10	10	0	2	0
2	0	11	11	-2.377442004	2	0
2	2	11	11	-1.818746961	2	0
2	3	11	11	-1.781261051	2	0
2	1	11	11	-1.109997496	2	0
2	4	11	10	0	2	0
3	2	12	14	-1.818745137	2	0
3	3	12	13	-1.781265321	2	0
3	0	12	13	-1.634959771	2	0
3	1	12	13	-1.109986402	2	0
3	4	12	12	0	2	0
4	0	9	9	-7.912495608	2	0
4	1	9	9	-7.1400462	2	0
4	2	9	9	-6.318795099	2	0
4	3	9	10	-5.786271433	2	0
4	4	9	9	0	2	0
5	0	11	13	-2.358742433	2	0
5	3	11	12	-2.25754361	2	0
5	1	11	11	-0.57374199	2	0
5	4	11	11	-0.161273226	2	0
5	2	11	14	0	2	0
6	0	12	13	-2.876245974	2	0
6	1	12	12	-1.788710879	2	0
6	3	12	11	-0.974939188	2	0
6	4	12	12	-0.431209687	2	0
6	2	12	12	0	2	0
7	0	9	9	-3.165043254	2	0
7	1	9	9	-2.617516131	2	0
7	2	9	9	-2.583779145	2	0
7	3	9	9	-2.546271307	2	0
7	4	9	9	0	2	0
8	2	10	10	-1.841261444	2	0
8	0	10	12	-1.387464514	2	0
8	1	10	10	-1.357470827	2	0
8	3	10	10	-1.038753975	2	0
8	4	10	11	0	2	0
9	0	8	8	-1.841298111	2	0
9	1	8	8	-1.316307659	2	0
9	4	8	7	-0.948848175	2	0
9	3	8	9	-0.750072163	2	0
9	2	8	8	0	2	0
1	0	10	10	-3.787508291	3	0
1	1	10	11	-3.011224855	3	0
1	4	10	11	-2.906256119	3	0
1	3	10	9	-2.19376924	3	0
1	2	10	10	0	3	0
2	0	11	11	-3.843751949	3	0
2	4	11	10	-2.715017487	3	0
2	1	11	12	-2.077413159	3	0
2	2	11	11	-0.281240525	3	0
2	3	11	10	0	3	0
3	3	12	13	-2.163717638	3	0
3	2	12	12	-1.949986397	3	0
3	4	12	12	-1.886242547	3	0
3	1	12	13	-0.731266032	3	0
3	0	12	12	0	3	0
4	0	9	8	-12.05628703	3	0
4	1	9	8	-12.0225391	3	0
4	4	9	8	-11.67003287	3	0
4	2	9	9	-3.026175866	3	0
4	3	9	9	0	3	0
5	4	11	12	-1.90877703	3	0
5	3	11	12	-1.691272646	3	0
5	1	11	10	-1.518782855	3	0
5	2	11	11	-1.477481198	3	1
5	0	11	12	0	3	0
5	0	11	11	4.810117882	3	0
6	2	12	11	-4.278740351	3	0
6	3	12	12	-4.245006282	3	0
6	0	12	13	-3.611266242	3	0
6	4	12	11	-2.932458225	3	0
6	1	12	13	0	3	0
7	0	9	9	-5.253775581	3	0
7	2	9	8	-3.693762839	3	0
7	3	9	9	-3.660021738	3	0
7	4	9	8	-2.122499053	3	0
7	1	9	9	0	3	0
8	0	10	10	-1.346204367	3	0
8	4	10	10	-1.207543748	3	0
8	2	10	10	-1.023748851	3	0
8	1	10	10	-0.570029888	3	0
8	3	10	10	0	3	0
9	0	8	8	-1.863704523	3	0
9	2	8	8	-1.788565203	3	0
9	1	8	8	-1.582505872	3	0
9	4	8	8	-0.712507921	3	0
9	3	8	8	0	3	0
1	3	10	10	-2.977488286	4	0
1	2	10	10	-2.703754411	4	0
1	0	10	10	-2.156255309	4	0
1	4	10	11	-0.172492968	4	0
1	1	10	11	0	4	0
2	2	11	13	-5.403610629	4	0
2	0	11	12	-5.186252546	4	0
2	4	11	11	-1.162520562	4	0
2	3	11	11	-0.877491685	4	0
2	1	11	13	0	4	0
2	3	11	10	3.288056306	4	0
3	2	12	13	-2.583773102	4	1
3	3	12	13	-2.527512935	4	1
3	4	12	13	-2.152530759	4	1
3	0	12	12	-2.036202542	4	0
3	1	12	14	0	4	0
3	1	12	13	5.695325539	4	0
4	0	9	9	-2.452502626	4	1
4	3	9	9	-1.263707093	4	1
4	4	9	9	-0.228757772	4	1
4	1	9	10	-0.056249699	4	0
4	2	9	11	0	4	0
4	2	9	9	6.055119727	4	0
5	2	11	13	-4.02377313	4	0
5	0	11	11	-3.776261883	4	0
5	3	11	12	-3.277524005	4	0
5	4	11	11	-2.542518164	4	0
5	1	11	11	0	4	0
6	3	12	13	-2.201267193	4	0
6	1	12	13	-0.63361827	4	0
6	4	12	12	-0.446282519	4	0
6	2	12	13	-0.217527248	4	0
6	0	12	12	0	4	0
7	0	9	9	-8.486263484	4	1
7	2	9	9	-8.043792648	4	1
7	4	9	8	-6.262519775	4	0
7	3	9	10	-5.947535233	4	0
7	1	9	9	0	4	1
7	3	9	9	4.277806402	4	0
8	2	10	10	-2.426228541	4	1
8	0	10	10	-2.20870723	4	1
8	4	10	10	-0.284964971	4	1
8	1	10	10	-0.112451169	4	1
8	3	10	9	0	4	0
8	3	10	10	5.665329873	4	0
9	0	8	8	-3.806195674	4	0
9	3	8	8	-3.637462619	4	0
9	2	8	8	-3.363761713	4	0
9	4	8	8	-1.852501186	4	0
9	1	8	8	0	4	0
1	1	10	12	-4.631151534	5	0
1	3	10	10	-2.122495511	5	0
1	4	10	10	-2.073736369	5	0
1	0	10	12	-0.622490246	5	0
1	2	10	13	0	5	0
1	4	10	11	10.94910195	5	0
2	1	11	12	-2.741244905	5	0
2	0	11	12	-1.702514628	5	0
2	3	11	10	-1.582498319	5	0
2	4	11	11	-0.453733754	5	0
2	2	11	12	0	5	0
3	1	12	12	-5.325027748	5	1
3	2	12	11	-3.663799881	5	0
3	0	12	12	-2.666294699	5	1
3	3	12	13	-2.276270993	5	0
3	4	12	11	0	5	0
3	3	12	12	7.078741547	5	0
4	2	9	7	-3.483648805	5	0
4	3	9	9	-2.523749115	5	0
4	1	9	9	-2.332535327	5	0
4	0	9	9	-1.541225308	5	0
4	4	9	9	0	5	0
5	1	11	11	-5.426152769	5	0
5	4	11	12	-2.531264516	5	0
5	3	11	12	-1.229981565	5	0
5	2	11	11	-0.187486947	5	0
5	0	11	13	0	5	0
6	1	12	12	-4.346340156	5	0
6	2	12	10	-2.662585097	5	0
6	4	12	13	-1.721316854	5	0
6	3	12	12	-0.149902705	5	0
6	0	12	13	0	5	0
7	0	9	9	-2.373797244	5	0
7	3	9	9	-0.588775707	5	0
7	1	9	9	-0.127541292	5	0
7	2	9	8	-0.086265051	5	0
7	4	9	8	0	5	0
8	1	10	10	-2.917465444	5	0
8	2	10	10	-0.626252139	5	0
8	3	10	10	-0.588745968	5	0
8	0	10	12	-0.168711023	5	0
8	4	10	10	0	5	0
8	0	10	11	2.976482462	5	0
9	0	8	8	-3.183627669	5	2
9	2	8	7	-2.538732678	5	0
9	3	8	8	-2.501218695	5	2
9	1	8	8	-2.040008446	5	2
9	4	8	9	0	5	0
9	4	8	8	3.437626357	5	0
9	4	8	9	18.96263066	5	0
9	4	8	8	20.40269339	5	0
1	3	10	12	-6.431138404	6	0
1	0	10	10	-4.942399808	6	1
1	4	10	10	-4.773762273	6	1
1	1	10	10	-1.383660277	6	1
1	2	10	10	0	6	1
1	3	10	10	12.12670097	6	0
2	1	11	12	-7.140025524	6	0
2	3	11	12	-5.324999363	6	0
2	0	11	12	-4.893761499	6	0
2	2	11	13	-0.648742925	6	0
2	4	11	11	0	6	0
3	3	12	12	-6.498761385	6	1
3	1	12	12	-2.756181124	6	1
3	4	12	12	-1.826155071	6	1
3	0	12	9	-1.45494833	6	0
3	2	12	12	0	6	1
3	0	12	12	2.725410465	6	0
4	3	9	8	-1.638094327	6	1
4	4	9	9	-1.061233876	6	1
4	0	9	9	-0.959964689	6	0
4	1	9	8	-0.033760371	6	1
4	2	9	8	0	6	1
4	0	9	8	6.730231528	6	0
4	0	9	9	12.15270881	6	0
5	4	11	13	-10.24866179	6	2
5	1	11	13	-6.791291131	6	2
5	2	11	12	-5.947548098	6	0
5	3	11	11	-5.898770779	6	0
5	0	11	9	0	6	0
5	2	11	13	7.54758756	6	1
5	0	11	13	12.52767656	6	0
6	3	12	14	-3.426792028	6	0
6	0	12	11	-1.398705088	6	0
6	2	12	11	-1.046216459	6	0
6	4	12	13	-0.959927605	6	0
6	1	12	11	0	6	0
7	3	9	10	-3.506271516	6	0
7	4	9	9	-2.388744609	6	1
7	1	9	9	-1.676227054	6	1
7	0	9	10	-0.622514516	6	0
7	2	9	8	0	6	0
7	0	9	9	7.045320653	6	0
8	3	10	10	-8.557567629	6	0
8	0	10	9	-8.148823728	6	0
8	2	10	11	-4.286311012	6	0
8	4	10	11	-3.930013563	6	0
8	1	10	12	0	6	0
9	0	8	8	-7.968765307	6	0
9	3	8	7	-7.545041229	6	0
9	2	8	8	-5.366285446	6	0
9	4	8	8	-3.120004547	6	0
9	1	8	8	0	6	0
1	0	10	10	-3.108690509	7	0
1	2	10	11	-2.75245049	7	0
1	4	10	11	-1.5711141	7	0
1	1	10	10	-1.158664637	7	0
1	3	10	11	0	7	0
2	0	11	11	-3.907569185	7	0
2	2	11	12	-2.448801504	7	0
2	4	11	11	-1.515058742	7	0
2	3	11	11	-1.001310532	7	0
2	1	11	12	0	7	0
3	0	12	12	-5.313844356	7	0
3	4	12	15	-4.068806939	7	0
3	1	12	14	-3.116317836	7	0
3	2	12	13	-1.425107886	7	0
3	3	12	11	0	7	0
4	0	9	9	-2.61372111	7	1
4	2	9	8	-1.42500067	7	0
4	4	9	10	-1.346279361	7	0
4	1	9	9	-1.203723784	7	1
4	3	9	11	0	7	0
4	2	9	9	9.392929301	7	0
5	2	11	10	-2.190126406	7	0
5	0	11	11	-0.926376891	7	2
5	1	11	11	-0.888842677	7	2
5	4	11	12	-0.491401164	7	0
5	3	11	11	0	7	2
5	4	11	11	4.161378042	7	1
5	2	11	11	8.987552436	7	0
6	0	12	12	-5.606256749	7	1
6	2	12	13	-5.519997283	7	0
6	1	12	12	-4.758788654	7	1
6	4	12	12	-3.798776714	7	1
6	3	12	12	0	7	1
6	2	12	12	7.84011535	7	0
7	0	9	9	-5.268717176	7	1
7	2	9	11	-4.372465586	7	0
7	1	9	9	-3.611213351	7	1
7	4	9	9	-2.92123974	7	1
7	3	9	11	0	7	0
7	2	9	9	3.722665237	7	0
8	2	10	10	-1.470028915	7	1
8	0	10	10	-1.016281058	7	1
8	4	10	11	-0.851307618	7	0
8	1	10	10	-0.708708439	7	1
8	3	10	10	0	7	1
8	4	10	10	2.946276626	7	0
9	0	8	8	-2.591247367	7	1
9	2	8	9	-1.965014208	7	0
9	1	8	8	-1.181240191	7	1
9	4	8	8	-0.783719956	7	1
9	3	8	8	0	7	1
9	2	8	8	3.812805504	7	0
1	3	10	10	-15.27383559	8	0
1	0	10	11	-14.53881115	8	0
1	2	10	12	-12.52504986	8	0
1	4	10	10	-6.712542886	8	0
1	1	10	8	0	8	0
2	4	11	14	-17.80493401	8	0
2	3	11	11	-17.00571313	8	0
2	0	11	12	-16.83382385	8	0
2	2	11	13	-16.75509967	8	0
2	1	11	11	0	8	0
3	4	12	13	-7.927524691	8	0
3	2	12	13	-7.170006189	8	0
3	3	12	11	-6.026298321	8	0
3	0	12	14	-5.313775454	8	0
3	1	12	12	0	8	0
4	0	9	8	-7.788779386	8	0
4	3	9	9	-6.836254526	8	0
4	4	9	10	-6.262478578	8	0
4	2	9	10	-5.775023151	8	0
4	1	9	9	0	8	0
5	0	11	13	-4.031274468	8	0
5	3	11	13	-3.371287218	8	0
5	2	11	10	-2.872528299	8	0
5	4	11	12	-1.942522193	8	0
5	1	11	11	0	8	0
6	3	12	12	-6.273800454	8	0
6	0	12	14	-5.853754103	8	0
6	2	12	13	-5.190040481	8	1
6	4	12	13	-4.552497194	8	1
6	1	12	12	0	8	0
6	0	12	13	7.438946462	8	0
7	0	9	7	-7.271292043	8	0
7	3	9	8	-6.251285033	8	0
7	2	9	7	-5.190010898	8	0
7	4	9	9	-2.122473636	8	0
7	1	9	9	0	8	0
8	0	10	11	-2.950655196	8	0
8	3	10	10	-2.201265162	8	0
8	4	10	9	-2.16755427	8	0
8	2	10	10	-0.240029076	8	0
8	1	10	11	0	8	0
9	3	8	8	-3.843787208	8	1
9	0	8	7	-1.736270624	8	0
9	4	8	8	-1.559995346	8	1
9	2	8	8	-1.365034456	8	1
9	1	8	9	0	8	0
9	0	8	8	3.186505247	8	0
1	0	10	11	-3.02251767	9	0
1	3	10	11	-2.628587697	9	0
1	2	10	10	-2.373703965	9	0
1	1	10	10	-0.701241668	9	0
1	4	10	10	0	9	0
2	3	11	11	-6.116306152	9	0
2	0	11	14	-4.237558121	9	0
2	1	11	12	-0.431285312	9	2
2	2	11	12	-0.393711538	9	2
2	4	11	10	0	9	0
2	3	11	12	5.151330467	9	1
2	4	11	12	6.114940747	9	0
3	3	12	13	-8.366283113	9	0
3	0	12	13	-7.657530523	9	0
3	2	12	13	-7.031266561	9	0
3	1	12	13	-5.966278709	9	0
3	4	12	13	0	9	0
4	3	9	9	-1.852485769	9	0
4	1	9	9	-1.657510973	9	0
4	0	9	10	-1.436249228	9	0
4	4	9	9	-0.731263531	9	0
4	2	9	10	0	9	0
5	3	11	12	-6.206286118	9	0
5	0	11	12	-6.059967704	9	0
5	1	11	12	-2.996251501	9	0
5	2	11	12	-2.68876361	9	0
5	4	11	9	0	9	0
5	4	11	10	6.025521193	9	0
5	4	11	11	9.895324469	9	0
6	0	12	10	-12.73135596	9	0
6	1	12	12	-8.700099984	9	0
6	4	12	11	-7.728826648	9	1
6	3	12	11	-1.087556345	9	1
6	2	12	14	0	9	0
6	0	12	11	3.756544093	9	0
7	0	9	9	-1.560022117	9	0
7	3	9	9	-1.436266467	9	0
7	1	9	8	-0.926257234	9	0
7	2	9	9	-0.888700647	9	0
7	4	9	8	0	9	0
8	0	10	10	-3.731336665	9	0
8	1	10	10	-3.120081838	9	0
8	4	10	10	-2.981273824	9	0
8	3	10	10	-2.212527403	9	0
8	2	10	11	0	9	0
9	2	8	8	-2.396251155	9	1
9	3	8	8	-2.358771443	9	1
9	0	8	8	-1.110048693	9	1
9	1	8	8	-0.746069022	9	1
9	4	8	9	0	9	0
9	4	8	8	3.622779107	9	0
1	4	10	12	-2.872665486	10	0
1	3	10	10	-2.658848412	10	0
1	1	10	10	-1.721372843	10	0
1	2	10	8	-0.423868295	10	0
1	0	10	11	0	10	0
2	3	11	14	-6.806225371	10	0
2	0	11	14	-4.462491031	10	0
2	2	11	11	-3.108760586	10	0
2	1	11	11	-0.378706725	10	0
2	4	11	14	0	10	0
3	0	12	12	-17.98136392	10	0
3	3	12	12	-16.05011506	10	0
3	4	12	14	-13.42869423	10	0
3	1	12	12	-6.990054591	10	0
3	2	12	12	0	10	0
4	3	9	8	-3.585007157	10	0
4	4	9	8	-3.281259544	10	0
4	0	9	9	-2.613724498	10	0
4	1	9	9	-0.037475181	10	0
4	2	9	9	0	10	0
5	3	11	14	-5.208740937	10	0
5	2	11	11	-3.648745851	10	0
5	1	11	13	-3.416224728	10	1
5	0	11	11	-2.707431358	10	0
5	4	11	12	0	10	0
5	0	11	13	4.802876228	10	0
6	1	12	14	-3.322518702	10	1
6	3	12	11	-2.212471102	10	0
6	0	12	13	-1.331243669	10	0
6	4	12	13	-0.423744598	10	0
6	2	12	12	0	10	0
6	0	12	14	5.841711088	10	0
7	3	9	8	-6.10894773	10	0
7	2	9	9	-4.99883086	10	0
7	0	9	9	-4.777662186	10	0
7	1	9	10	-4.743924419	10	0
7	4	9	10	0	10	0
8	2	10	11	-2.977532296	10	0
8	0	10	10	-2.801270508	10	0
8	3	10	10	-2.152511698	10	0
8	4	10	9	-2.11877966	10	0
8	1	10	11	0	10	0
9	2	8	8	-3.221322067	10	0
9	3	8	8	-2.688795693	10	0
9	0	8	8	-2.527484707	10	0
9	1	8	8	-2.201272662	10	0
9	4	8	9	0	10	0
1	2	10	10	-1.368695517	11	0
1	0	10	11	-1.143731617	11	0
1	1	10	11	-1.102462981	11	0
1	4	10	10	-0.266195557	11	0
1	3	10	10	0	11	0
2	3	11	10	-2.257552933	11	0
2	2	11	12	-1.646296127	11	0
2	4	11	11	-0.813783669	11	0
2	0	11	10	-0.04127598	11	0
2	1	11	11	0	11	0
3	1	12	13	-1.102617927	11	0
3	2	12	13	-1.038868036	11	0
3	4	12	13	-0.926323275	11	0
3	0	12	13	-0.483860148	11	0
3	3	12	12	0	11	0
4	1	9	9	-21.50268775	11	0
4	0	9	9	-21.21387219	11	0
4	4	9	8	-19.67638476	11	0
4	2	9	6	-16.09887301	11	0
4	3	9	9	0	11	0
5	0	11	13	-2.081256405	11	1
5	2	11	13	-1.646261752	11	1
5	3	11	14	-0.907483705	11	0
5	4	11	13	-0.51375321	11	1
5	1	11	11	0	11	0
5	1	11	13	4.705355706	11	0
6	2	12	11	-3.408853284	11	1
6	0	12	13	-2.523804531	11	0
6	1	12	10	-1.102583552	11	0
6	4	12	11	-0.926339316	11	1
6	3	12	12	0	11	0
6	1	12	11	7.593185221	11	0
7	3	9	9	-3.011315792	11	0
7	4	9	9	-2.947524495	11	0
7	0	9	10	-2.835038118	11	0
7	1	9	9	-2.793786148	11	0
7	2	9	9	0	11	0
8	2	10	11	-1.492476999	11	0
8	3	10	11	-1.44373942	11	0
8	0	10	11	-1.267410497	11	0
8	1	10	10	-0.176258507	11	0
8	4	10	10	0	11	0
9	3	8	9	-2.651250773	11	1
9	4	8	9	-2.257497413	11	1
9	0	8	9	-0.794986183	11	1
9	1	8	8	-0.753726192	11	0
9	2	8	10	0	11	0
9	1	8	9	6.591608044	11	0
1	0	10	10	-2.988775423	12	0
1	4	10	11	-2.797515073	12	0
1	2	10	11	-2.613773873	12	0
1	1	10	10	-1.361286886	12	0
1	3	10	12	0	12	0
2	4	11	13	-11.70397756	12	0
2	1	11	11	-11.55767889	12	0
2	0	11	12	-10.96519431	12	0
2	3	11	13	-8.186394169	12	0
2	2	11	11	0	12	0
3	0	12	14	-7.597575649	12	0
3	4	12	13	-7.406332173	12	0
3	2	12	14	-6.892600421	12	0
3	3	12	13	-6.228810966	12	0
3	1	12	12	0	12	0
4	4	9	10	-3.438081144	12	0
4	1	9	9	-3.292554806	12	0
4	3	9	9	-2.831145132	12	0
4	2	9	10	-2.505023608	12	0
4	0	9	9	0	12	0
5	4	11	11	-6.14607057	12	0
5	3	11	13	-5.86876704	12	0
5	2	11	11	-4.642322839	12	0
5	0	11	11	-3.48723023	12	0
5	1	11	11	0	12	0
6	1	12	11	-3.592572141	12	0
6	3	12	12	-3.491361964	12	0
6	2	12	12	-2.804971099	12	0
6	4	12	12	-2.388559455	12	0
6	0	12	13	0	12	0
7	1	9	9	-3.052544325	12	0
7	4	9	9	-1.968758935	12	0
7	2	9	8	-1.785048255	12	0
7	3	9	10	-1.721318104	12	0
7	0	9	8	0	12	0
8	3	10	10	-1.128884096	12	1
8	4	10	10	-1.076375144	12	1
8	0	10	10	-0.337596056	12	1
8	2	10	12	-0.261984189	12	0
8	1	10	10	0	12	1
8	2	10	10	9.632532891	12	0
9	4	8	8	-5.036221093	12	0
9	0	8	8	-3.00748192	12	0
9	3	8	8	-2.868759375	12	0
9	2	8	9	-1.672505733	12	0
9	1	8	8	0	12	0
1	1	10	9	-2.538762156	13	0
1	2	10	11	-2.490016504	13	0
1	4	10	11	-2.145002234	13	0
1	0	10	11	-1.488755783	13	0
1	3	10	10	0	13	0
2	3	11	12	-4.650023238	13	0
2	2	11	10	-4.147513885	13	0
2	1	11	10	-3.926242712	13	0
2	0	11	12	-2.381234313	13	0
2	4	11	10	0	13	0
3	1	12	12	-1.668913474	13	0
3	3	12	12	-0.772700187	13	0
3	0	12	13	-0.348885954	13	0
3	4	12	12	-0.195188544	13	0
3	2	12	13	0	13	0
4	2	9	10	-3.277297601	13	0
4	4	9	8	-1.852496394	13	0
4	0	9	10	-1.736187083	13	0
4	1	9	9	-1.43622053	13	0
4	3	9	10	0	13	0
5	4	11	10	-3.209982221	13	0
5	1	11	12	-2.793760784	13	1
5	3	11	11	-2.707500003	13	0
5	0	11	11	-0.371061482	13	0
5	2	11	11	0	13	0
5	0	11	9	0.591427715	13	0
5	0	11	12	1.198783983	13	0
6	4	12	12	-2.752542876	13	0
6	2	12	13	-2.017548076	13	0
6	0	12	12	-1.826274809	13	0
6	1	12	12	-1.503796116	13	0
6	3	12	12	0	13	0
7	2	9	10	-0.761242739	13	0
7	3	9	8	-0.453748754	13	0
7	4	9	9	-0.416267948	13	0
7	0	9	10	-0.300009105	13	0
7	1	9	9	0	13	0
8	4	10	10	-1.488791043	13	1
8	3	10	10	-1.256258931	13	1
8	2	10	9	-1.001287751	13	0
8	1	10	10	-0.779955434	13	0
8	0	10	11	0	13	0
8	1	10	8	7.045129977	13	0
8	1	10	10	9.182629675	13	0
9	4	8	8	-1.942594485	13	0
9	0	8	7	-0.971320003	13	0
9	1	8	8	-0.941345691	13	0
9	2	8	9	-0.352615348	13	0
9	3	8	8	0	13	0
1	0	10	10	-12.14631012	14	0
1	2	10	10	-10.0013021	14	0
1	4	10	11	-9.667555646	14	0
1	1	10	12	-3.179390831	14	0
1	3	10	9	0	14	0
2	4	11	12	-6.135551655	14	1
2	1	11	13	-5.74570477	14	0
2	0	11	11	-4.991919047	14	0
2	2	11	11	-3.093781972	14	0
2	3	11	12	0	14	1
2	1	11	12	3.002188114	14	0
3	1	12	13	-3.543138682	14	0
3	4	12	15	-2.426278175	14	0
3	3	12	14	-1.443796191	14	0
3	2	12	11	-0.960028438	14	2
3	0	12	12	0	14	0
3	3	12	11	4.806660517	14	1
3	1	12	11	7.184086375	14	0
4	0	9	8	-4.698806285	14	0
4	2	9	8	-4.623768319	14	0
4	1	9	9	-2.595057636	14	0
4	4	9	11	-0.735031726	14	0
4	3	9	10	0	14	0
5	2	11	12	-1.511271517	14	0
5	4	11	11	-0.929982668	14	0
5	3	11	13	-0.46501886	14	0
5	0	11	12	-0.326223659	14	0
5	1	11	13	0	14	0
6	3	12	10	-2.973803684	14	0
6	1	12	11	-1.76627702	14	2
6	2	12	13	-0.442510627	14	0
6	4	12	11	-0.378799277	14	2
6	0	12	11	0	14	2
6	3	12	11	5.121724277	14	1
6	2	12	11	6.842786445	14	0
7	2	9	9	-0.689951457	14	0
7	3	9	9	-0.633716967	14	0
7	4	9	9	-0.603746457	14	0
7	1	9	8	-0.213654106	14	0
7	0	9	8	0	14	0
8	2	10	10	-4.601296075	14	0
8	0	10	10	-4.428770711	14	0
8	4	10	11	-3.525051815	14	0
8	1	10	8	-1.874880358	14	0
8	3	10	10	0	14	0
9	4	8	8	-3.315014551	14	0
9	2	8	8	-3.131267882	14	0
9	0	8	8	-2.148796106	14	0
9	3	8	8	-0.690011197	14	0
9	1	8	8	0	14	0
1	2	10	9	-1.293755415	15	0
1	4	10	10	-0.918750791	15	0
1	3	10	11	-0.68999703	15	0
1	1	10	10	-0.4985259	15	0
1	0	10	10	0	15	0
2	0	11	12	-2.306223846	15	1
2	4	11	9	-1.875019575	15	0
2	1	11	12	-1.454992495	15	1
2	3	11	12	-0.251281786	15	1
2	2	11	10	0	15	0
2	4	11	12	6.085285704	15	0
3	2	12	12	-1.455042078	15	0
3	0	12	14	-1.263793655	15	0
3	1	12	13	-1.222548508	15	0
3	3	12	15	-1.143768336	15	0
3	4	12	13	0	15	0
4	1	9	9	-3.007529056	15	1
4	0	9	7	-2.778785764	15	0
4	4	9	7	-2.617529047	15	0
4	3	9	9	-2.388795182	15	1
4	2	9	7	0	15	0
4	4	9	9	2.665429082	15	0
5	0	11	12	-5.838814083	15	0
5	1	11	11	-3.00753593	15	1
5	4	11	11	-2.617468995	15	1
5	3	11	13	-1.848761116	15	0
5	2	11	10	0	15	0
5	3	11	11	4.716683051	15	0
6	2	12	10	-3.326259762	15	0
6	4	12	10	-2.928757582	15	0
6	0	12	13	-2.009966166	15	2
6	1	12	13	-1.69877836	15	2
6	3	12	14	0	15	0
6	3	12	13	3.572575811	15	1
6	4	12	13	8.001325272	15	0
7	1	9	9	-2.197495092	15	1
7	4	9	9	-1.807498469	15	1
7	0	9	7	-1.158735075	15	0
7	3	9	9	-1.038750485	15	1
7	2	9	9	0	15	1
7	0	9	9	7.836646348	15	0
8	2	10	10	-4.372464242	15	1
8	3	10	10	-3.521288412	15	1
8	0	10	10	-3.371256958	15	1
8	4	10	12	-0.442467919	15	0
8	1	10	13	0	15	0
8	1	10	10	3.010108407	15	0
9	0	8	7	-4.196265526	15	0
9	1	8	8	-4.155018191	15	1
9	3	8	8	-3.783726086	15	1
9	4	8	9	-3.742499377	15	0
9	2	8	8	0	15	1
9	4	8	8	6.017608765	15	0
1	4	10	10	-2.141243987	16	0
1	3	10	10	-1.837518717	16	0
1	2	10	10	-1.556262672	16	0
1	1	10	12	-1.263747978	16	0
1	0	10	11	0	16	0
2	4	11	12	-2.471267612	16	0
2	3	11	11	-2.1975303	16	0
2	2	11	11	-0.566280235	16	0
2	1	11	12	-0.273766218	16	0
2	0	11	12	0	16	0
3	1	12	14	-2.043585966	16	0
3	4	12	12	-1.871287474	16	0
3	2	12	13	-0.956278316	16	0
3	3	12	13	-0.577539247	16	0
3	0	12	12	0	16	0
4	4	9	10	-1.574986096	16	0
4	3	9	9	-0.611229671	16	0
4	1	9	9	-0.367473389	16	0
4	0	9	9	-0.093747327	16	0
4	2	9	9	0	16	0
5	4	11	12	-3.555169146	16	0
5	1	11	13	-2.047680251	16	0
5	3	11	10	-0.641422002	16	0
5	0	11	11	-0.453894534	16	0
5	2	11	13	0	16	0
6	4	12	14	-3.521254193	16	0
6	1	12	11	-2.673769736	16	0
6	2	12	12	-2.636264815	16	0
6	3	12	12	-2.587513329	16	0
6	0	12	13	0	16	0
7	1	9	10	-2.70751292	16	0
7	3	9	9	-2.291262785	16	0
7	4	9	7	-1.90497993	16	0
7	0	9	9	-0.093679516	16	0
7	2	9	7	0	16	0
8	3	10	10	-0.877520592	16	0
8	2	10	10	-0.596260692	16	0
8	4	10	10	-0.491261591	16	0
8	1	10	11	-0.273725229	16	0
8	0	10	10	0	16	0
9	4	8	6	-2.197473374	16	0
9	0	8	8	-1.07622749	16	0
9	2	8	8	-0.982511516	16	0
9	3	8	8	-0.933745135	16	0
9	1	8	8	0	16	0
